# Supplementary material
Source: Research Square preprint supplement (doi:10.21203/rs.3.rs-10074751/v1)
Supplement: Supplementary file 1 [file 9d3c6484b9495391338509c9.docx]

**Supporting Information**

**Process design and enhancement of extraction distillation for separating n-propanol and dimethyl carbonate using imidazolium-based ionic liquids**

Xin Wanga, Xiaokun Wanga, Han Liua,Chao Sun a*

*a Shandong Peninsula Engineering Research Center of Comprehensive Brine Utilization, Weifang University of Science and Technology, Weifang 262700, China*

***Corresponding Author**

Chao Sun

Shandong Peninsula Engineering Research Center of Comprehensive Brine Utilization, Weifang University of Science and Technology, Weifang 262700, China

*E-mail: sunc10517@wfust.edu.cn

***Index***

**Table S1** Formula for calculating TCC, TOC and Gas emission

**Table S2** Dinfinite activity coefficients (γ∞) , and the selectivity coefficients (S∞) of different ILs

**Table S3** The acute toxicity of each IL

**Table S4** Non-bonding interaction energy of ternary systems of DMC-NPA-IL

**Table S5** The volume parameters (*Rk*) and surface area parameters (*Qk*) of the groups

**Table S6** The binary interaction parameters of the groups

**Table S7** The scalar parameters of [EMim][AC]

**Table S8** Process parameters after multi-objective optimization

**Table S9** Specific cost for [EMim][AC]-ED, and [EMim][AC]-HIED

**Table S10** Gas emissions for [EMim][AC]-ED, and [EMim][AC]-HIED

**Fig. S1** ESP of [EMim][H2PO4], and [EMim][DEP]

**Fig. S2** The stable structures of extractant-NPA/DMC

**Fig. S3** TheMOO diagram

**Fig. S4** The T-H diagram of the process

**Section 1** The specific operational steps of QC calculation

**Section 2** The specific operational steps of MD simulation

Table S1.Formula for calculating TCC, TOC and Gas emission

| **Parameters** | **Economic calculation** |
| --- | --- |
| Heat Exchanger | MS=1431.7  Reboiler = 0.568 Condenser = 0.852           | P/atm | ≤10.2 | 20.4 | 27.2 | | --- | --- | --- | --- | | *Fp* | 0.00 | 0.10 | 0.25 | |
| A is heat exchange area (m2); *Q* is the duty of heat exchanger (kW); is temperature difference (*k*);  *k* is heat transfer coeffcients(kW/(k·m2)). |
| Column vessel | *H*=0.61×(*NT－*2)×1.2  *FC* = *Fm Fp*, *Fm* = 3.67 |
| | P/atm | ≤3.4 | 6.8 | 13.6 | | --- | --- | --- | --- | | *Fp* | 1.00 | 1.05 | 1.15 | |
| *D* is tower diameter (); *H* is tower height (); *NT* is number of tower stage. |
| Column stage | *Fc* = *Ff*+ *Fα + Fm*  *Ff* = 1.0, *Fα* = 0, *Fm* = 1.7 |
| Energy cost | LP stream (433 K): 7.78 $/GJ |
| MP stream (457 K): 8.22 $/GJ |
| HP stream (527 K): 9.88 $/GJ  Cooling water (310 K): 0.354 $/GJ  Refrigerated water (278 K): 4.43 $/GJ  Refrigerated water (253 K): 7.89 $/GJ |
| Annual steam | Cost = C*S* × Q*R* |
| Q*R* is reboiler duty (GJ); C*S* is steam price ($/GJ) |
| Annual cooling water | Cost = CW × QC |
| Q*C* is condenser duty (GJ); C*W* is price of cooling water |
| vacuum cost |  |
|  |
| where is the amount of air leakage, *P*[*torr*] is the vacuum pressure and V[ft3] is the volume of the vessel. | |
| *M&S* is *Marshall* & *Swift index*, *M&S*=1431.7 (data from *CEPCI*) | |
| Gas emission | *Mgasi* = *αiMCoali* |
| *α*CO2=2.493, *α*SO2 =0.075, and *α*NOx=0.0375  N=8000 h/year; *Qstandard* = 29307.6 kJ/kg; *αCoal,trans=*0.9 |

Table S2. Dinfinite activity coefficients (**γ∞**) , and the selectivity coefficients (S∞) in different ILs

| **type** | **γ∞** | **type** | **γ∞** | **S∞** |
| --- | --- | --- | --- | --- |
| NPA-[EMim][HSO4] | 2.0033 | DMC-[EMim][HSO4] | 5.1460 | 2.5688 |
| NPA-[BMim][HSO4] | 2.1996 | DMC-[BMim][HSO4] | 4.7907 | 2.1780 |
| NPA-[PMim][HSO4] | 2.1041 | DMC-[PMim][HSO4] | 4.3873 | 2.0851 |
| NPA-[HMim][HSO4] | 1.7982 | DMC-[HMim][HSO4] | 3.4849 | 1.9380 |
| NPA-[EMim][AC] | 0.0495 | DMC-[EMim][AC] | 2.4251 | 48.9979 |
| NPA-[BMim][AC] | 0.0616 | DMC-[BMim][AC] | 2.8740 | 46.6711 |
| NPA-[PMim][AC] | 0.0659 | DMC-[PMim][AC] | 2.9630 | 44.9584 |
| NPA-[HMim][AC] | 0.0645 | DMC-[HMim][AC] | 2.8243 | 43.7547 |
| NPA-[EMim][H2PO4] | 0.4818 | DMC-[EMim][H2PO4] | 4.5997 | 9.5460 |
| NPA-[BMim][H2PO4] | 0.6684 | DMC-[BMim][H2PO4] | 4.9784 | 7.4483 |
| NPA-[PMim][H2PO4] | 0.7043 | DMC-[PMim][H2PO4] | 5.4893 | 7.7939 |
| NPA-[HMim][H2PO4] | 0.6652 | DMC-[HMim][H2PO4] | 4.7620 | 7.1583 |
| NPA-[EMim][OTF] | 7.3091 | DMC-[EMim][OTF] | 2.5064 | 0.3429 |
| NPA-[BMim][OTF] | 4.4439 | DMC-[BMim][OTF] | 1.6696 | 0.3757 |
| NPA-[PMim][OTF] | 3.7072 | DMC-[PMim][OTF] | 1.4592 | 0.3936 |
| NPA-[HMim][OTF] | 2.9169 | DMC-[HMim][OTF] | 1.1876 | 0.4071 |
| NPA-[EMim][DEP] | 0.3738 | DMC-[EMim][DEP] | 3.8049 | 10.1787 |
| NPA-[BMim][DEP] | 0.3329 | DMC-[BMim][DEP] | 3.3673 | 10.1151 |
| NPA-[PMim][DEP] | 0.3214 | DMC-[PMim][DEP] | 3.2726 | 10.1811 |
| NPA-[HMim][DEP] | 0.2947 | DMC-[HMim][DEP] | 2.9645 | 10.0601 |
| NPA-[EMim][BF4] | 7.6018 | DMC-[EMim][BF4] | 4.3807 | 0.5763 |
| NPA-[BMim][BF4] | 5.7476 | DMC-[BMim][BF4] | 2.9355 | 0.5107 |
| NPA-[PMim][BF4] | 4.8686 | DMC-[PMim][BF4] | 2.4580 | 0.5049 |
| NPA-[HMim][BF4] | 3.7319 | DMC-[HMim][BF4] | 1.8222 | 0.4883 |
| NPA-[EMim][PF6] | 22.8309 | DMC-[EMim][PF6] | 2.9828 | 0.1306 |
| NPA-[BMim][PF6] | 10.7788 | DMC-[BMim][PF6] | 1.5446 | 0.1433 |
| NPA-[PMim][PF6] | 8.1614 | DMC-[PMim][PF6] | 1.2424 | 0.1522 |
| NPA-[HMim][PF6] | 5.8584 | DMC-[HMim][PF6] | 0.9303 | 0.1588 |
| NPA-[EMim][NTf2] | 6.7684 | DMC-[EMim][NTf2] | 0.8167 | 0.1207 |
| NPA-[BMim][NTf2] | 4.9378 | DMC-[BMim][NTf2] | 0.6821 | 0.1381 |
| NPA-[PMim][NTf2] | 4.2958 | DMC-[PMim][NTf2] | 0.6349 | 0.1478 |
| NPA-[HMim][NTf2] | 3.7903 | DMC-[HMim][NTf2] | 0.5826 | 0.1537 |
| NPA-[EMim][NO3] | 0.7305 | DMC-[EMim][NO3] | 2.9997 | 4.1063 |
| NPA-[BMim][NO3] | 0.8945 | DMC-[BMim][NO3] | 3.1358 | 3.5055 |
| NPA-[PMim][NO3] | 0.8956 | DMC-[PMim][NO3] | 2.9805 | 3.3279 |
| NPA-[HMim][NO3] | 0.7960 | DMC-[HMim][NO3] | 2.5099 | 3.1531 |
| NPA-[EMim][Br] | 0.1858 | DMC-[EMim][Br] | 1.3775 | 7.4157 |
| NPA-[BMim][Br] | 0.4207 | DMC-[BMim][Br] | 2.6445 | 6.2857 |
| NPA-[PMim][Br] | 0.5124 | DMC-[PMim][Br] | 3.0262 | 5.9065 |
| NPA-[HMim][Br] | 0.5923 | DMC-[HMim][Br] | 3.1052 | 5.2429 |

Table S3. The acute toxicity of each IL

| **Name** | **[EMim][DEP]** | | **[EMim][AC]** | **[EMim][H2PO4]** |
| --- | --- | --- | --- | --- |
| Fish (mg/L) | 7.84E6 | 4.99E7 | | 8.83E6 |
| Mysid (mg/L) | 2.21E8 | 2.97E9 | | 2.69E8 |
| Green Algae (mg/L) | 299000 | 1.13E6 | | 319000 |
| Daphnid (mg/L) | 2.78E6 | 1.60E7 | | 3.11E6 |

Table S4 Non-bonding interaction energy of ternary systems of DMC-NPA-IL

| **类型** | **静电力（kJ/mol）** | **范德华力（kJ/mol）** | **非键相互作用能（kJ/mol）** |
| --- | --- | --- | --- |
| DMC-NPA-[EMim][DEP] | | | |
| DMC-NPA | -0.8282 | -3.4542 | -4.2824 |
| DMC-[EMim]+ | -3.2954 | -5.7976 | -9.0930 |
| DMC-[DEP]- | -4.1088 | -7.5509 | -11.6596 |
| NPA-[EMim]+ | -7.8920 | -10.5106 | -18.4026 |
| NPA-[DEP]- | -44.1740 | -6.1396 | -50.3136 |
| DMC-NPA-[EMim][AC] | | | |
| DMC-NPA | -0.2727 | -2.4103 | -2.6830 |
| DMC-[EMim]+ | -2.9197 | -9.6251 | -12.5448 |
| DMC-[AC]- | -6.8159 | -4.2469 | -11.0628 |
| NPA-[EMim]+ | -6.1682 | -16.2601 | -22.4284 |
| NPA-[AC]- | -55.6820 | -0.0020 | -55.6840 |
| DMC-NPA-[EMim][H2PO4] | | | |
| DMC-NPA | -0.9791 | -3.0648 | -4.0439 |
| DMC-[EMim]+ | -0.5134 | -3.8848 | -4.3982 |
| DMC-[H2PO4]- | -4.4023 | -1.7928 | -6.1951 |
| NPA-[EMim]+ | -4.0366 | -10.2482 | -14.2848 |
| NPA-[H2PO4]- | -43.6284 | -0.0931 | -43.7215 |

Table S5.The volume parameters (*Rk*) and surface area parameters (*Qk*) of the groups

| **Group** | ***Rk*** | ***Qk*** |
| --- | --- | --- |
| CH3 | 0.9011 | 0.8480 |
| CH2 | 0.6744 | 0.5400 |
| OH | 1.0000 | 1.2000 |
| CH3O | 1.1450 | 1.0880 |
| COO | 1.2420 | 1.1880 |
| [MIM][AC] | 6.8459 | 4.3335 |

Table S6.The binary interaction parameters of the groups

| Group j  Group *i* | CH2 | OH | COO | CH2O | [MIM][AC] |
| --- | --- | --- | --- | --- | --- |
| CH2 | 0.00 | 986.50 | 387.10 | 251.50 | 371.56 |
| OH | 156.40 | 0.00 | 267.80 | 28.06 | -656.81 |
| COO | 329.30 | 139.40 | 0.00 | -234.00 | 406.64 |
| CH2O | 83.36 | 237.70 | 417.00 | 0.00 | 412.58 |
| [MIM][AC] | 667.48 | -239.17 | -3.56 | 4.59 | 0.00 |

Table S7. The scalar parameters of [EMim][AC]

| **Name** | **ρ**  **(g/mL)** | **Vc (cm3/mol)** | **Tb (K)** | **Tc (K)** | **Pc**  **(bar)** | **Zc** | **w** |
| --- | --- | --- | --- | --- | --- | --- | --- |
| [EMim][AC] | 1.027 | 544.00 | 578.8 | 807.1 | 29.19 | 0.2367 | 0.5889 |

Table S8. Process parameters after multi-objective optimization

| **Type** | **[EMim][AC]** |
| --- | --- |
| Number of stages of T1 | 38 |
| Reflux ratio | 0.3479 |
| Feed stage | 29 |
| Feed stage of Extractant | 5 |
| Number of stages of T2 | 9 |
| Reflux ratio of T2 | 0.5879 |
| Feed stage of T2 | 5 |
| Flow rate of [EMim][AC] (kmoL/h) | 17 |

Table S9. Specific cost for [EMim][AC]-ED, and [EMim][AC]-HIED

| **Equipment** | **Cost ($) of [EMim][AC]-ED** | **Cost ($) of [EMim][AC]-HIED** |
| --- | --- | --- |
| T1 | 346577.82 | 346577.82 |
| T2 | 212726.49 | 212726.49 |
| Condenser (T1) | 83144.18 | 83144.18 |
| Reboiler (T1) | 337878.33 | 321586.65 |
| Condenser (T2) | 96053.43 | 96053.43 |
| Reboiler (T2) | 117115.33 | 117115.33 |
| C1 | 15609.65 | 14273.25 |
| E1 |  | 50633.13 |
| TCC | 1209105.23 | 1242140.29 |
| TOC | 720053.19 | 689117.72 |
| TAC | 1123088.27 | 1103163.49 |

Table S10. Gas emissions for [EMim][AC]-ED, and [EMim][AC]-HIED

| **Type** | **CO2 (kg/Y)** | **SO2 (kg/Y)** | **NO*x* (kg/Y)** | **Total (kg/Y)** |
| --- | --- | --- | --- | --- |
| [EMim][AC]-ED | 1424.04 | 42.84 | 21.42 | 1488.30 |
| [EMim][AC]-HIED | 1358.98 | 40.88 | 20.44 | 1420.30 |


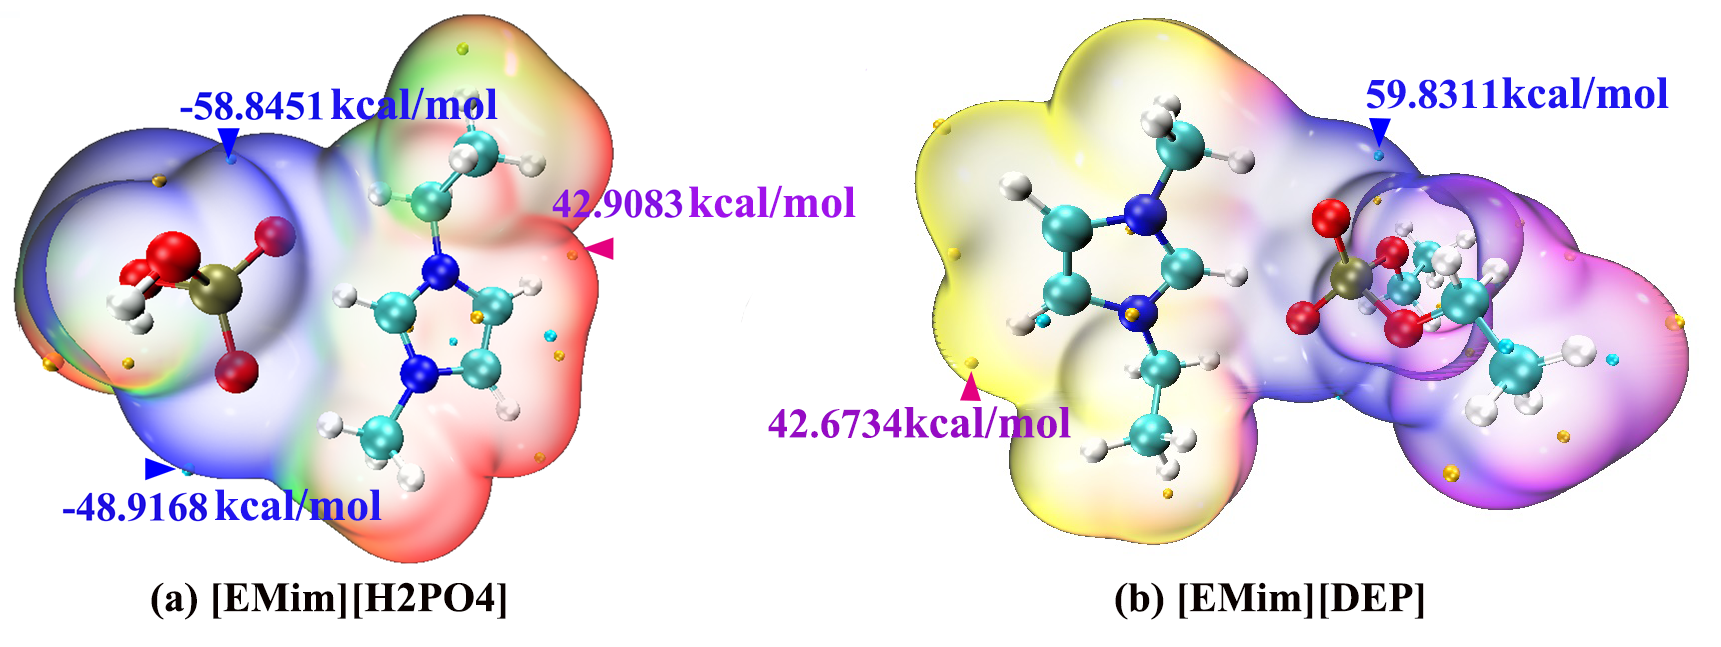


Fig. S1. ESP of [EMim][H2PO4], and [EMim][DEP]


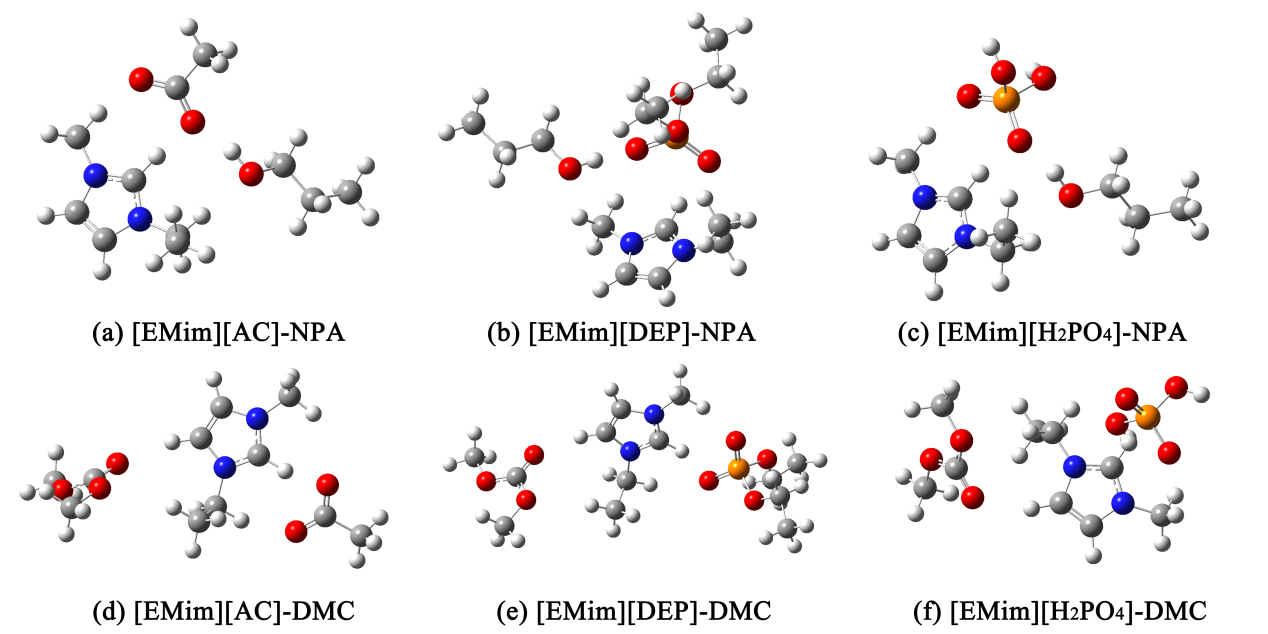


Fig. S2 The stable structures of extractant-NPA/DMC

Fig.S3. The MOO diagram





Fig. S4 The T-H diagram of the process

**Section 1** The specific operational steps of QC calculation

First, the molecular structure of DMC was imported into Gaussian 16; then, after setting the keyword EmpiricalDispersion=GD3BJ, the structure was subjected to optimization via the DFT/B3LYP method with the 6-311G(d, p) basis set; ultimately, the optimal configuration of DMC was achieved. The other molecules were optimized under the same conditions.

**Section 2** The specific operational steps of MD simulation

First, the initial structures of DMC, NPA and the ILs were optimized through Gaussian 16, and the atomic charge of each substance was calculated using Multiwfn 3.8; then, the corresponding topology files were obtained by the Sobtop program, and a virtual box was constructed with Packmol tool, 700 DMC molecules, 70 NPA molecules, and 300 IL molecules were placed in the virtual box; after that, the molecular dynamics simulation process was carried out at 101.32kPa, and the PME method was used to deal with the long-term electrostatic interaction and calculate the interactions.
